# Supplementary material
Source: HighWire-hosted journal article supplement (https://fn.bmj.com/content/archdischild-2023-326618)
Supplement: inline-supplementary-material-1 [file inline-supplementary-material-1.pdf]

Supplementary Table 1. Summaries of characteristics for children with and without a parental screening questionnaire (cognitive domain of either ASQ or PARCA-R)

| <b>Either ASQ-3 OR PARCA-R completed</b> | Yes<br><i>n</i> = 115 | No<br><i>n</i> = 96 |
|------------------------------------------|-----------------------|---------------------|
| Gestational age (completed weeks)        | 26.5 (1.8)            | 26.2 (1.9)          |
| Birthweight (g)                          | 832 (161)             | 855 (193)           |
| Male                                     | 56/115 (49%)          | 51/96 (53%)         |
| Maternal age (years)                     | 32.5 (5.3)            | 32.0 (5.8)          |
| Lower maternal education (<Year 12)      | 12/110 (11%)          | 10/65 (15%)         |
| English only spoken at home              | 90/115 (78%)          | 49/96 (51%)         |
| Cerebral palsy at 2 years                | 5/114 (4%)            | 8/95 (8%)           |
| Blind at 2 years                         | 0/115 (0%)            | 1/96 (1%)           |
| Deaf at 2 years                          | 1/115 (1%)            | 2/96 (2%)           |

Data are presented as mean (SD) for continuous measures, and *n*/total responders (%) for categorical measures.

Supplementary Table 2. Number of children above and below the cut-offs for moderate or severe delay on each assessment

|                                         | Cognitive Domain |                     | Language Domain                         |                     |    |
|-----------------------------------------|------------------|---------------------|-----------------------------------------|---------------------|----|
|                                         | Bayley-III Delay | Bayley-III No delay | Bayley-III Delay                        | Bayley-III No delay |    |
| <b>PARCA-R Delay</b>                    | 8                | 6                   | <b>PARCA-R Delay</b>                    | 8                   | 0  |
| <b>PARCA-R No delay</b>                 | 6                | 73                  | <b>PARCA-R No delay</b>                 | 3                   | 73 |
| <b>ASQ-3 Delay</b>                      | 10               | 19                  | <b>ASQ-3 Delay</b>                      | 10                  | 16 |
| <b>ASQ-3 No delay</b>                   | 2                | 63                  | <b>ASQ-3 No delay</b>                   | 5                   | 56 |
| <b>Delay on either questionnaire</b>    | 11               | 16                  | <b>Delay on either questionnaire</b>    | 9                   | 13 |
| <b>No delay on either questionnaire</b> | 1                | 44                  | <b>No delay on either questionnaire</b> | 1                   | 42 |

Nb: Cut off = <-2SD below the mean. Control data was used to calculate cut-offs for the Bayley Scales of Infant and Toddler Development, Third Edition (Bayley-III). Published norms were used to calculate cut offs for the Parent Report of Children's Abilities-Revised (PARCA-R) and the Ages & Stages Questionnaires Third Edition (ASQ-3), as per their respective manuals

Supplementary Table 3. Diagnostic utility of screening questionnaires to detect moderate/severe delay, as defined by the Bayley-III

| Screening Tool  | Domain    | n (%)   | Sens % [95% CI]   | Spec % [95%CI]    | PPV % [95%CI]     | NPV % [95%CI]     | Kappa [95%CI]     | p-value |
|-----------------|-----------|---------|-------------------|-------------------|-------------------|-------------------|-------------------|---------|
| PARCA-R         | Cognitive | 93 (44) | 57.1 [28.9, 82.3] | 92.4 [84.2, 97.2] | 57.1 [28.9, 82.3] | 92.4 [84.2, 97.2] | 0.50 [0.30, 0.70] | 1.00    |
|                 | Language  | 84 (40) | 72.7 [39.0, 94.0] | 100 [95.1, 100]   | 100 [63.1, 100]   | 96.1 [88.9, 99.2] | 0.82 [0.61, 1.03] | 0.25    |
| ASQ-3           | Cognitive | 94 (45) | 83.3 [51.6, 97.9] | 76.8 [66.2, 85.4] | 34.5 [17.9, 54.3] | 96.9 [89.3, 99.6] | 0.37 [0.20, 0.54] | <0.01   |
|                 | Language  | 87 (41) | 66.7 [38.4, 88.2] | 77.8 [66.4, 86.7] | 38.5 [20.2, 59.4] | 91.8 [81.9, 97.3] | 0.34 [0.14, 0.54] | 0.03    |
| PARCA-R & ASQ-3 | Cognitive | 72 (34) | 91.7 [61.5, 99.8] | 73.3 [60.3, 83.9] | 40.7 [22.4, 61.2] | 97.8 [88.2, 99.9] | 0.43 [0.23, 0.63] | <0.01   |
|                 | Language  | 65 (31) | 90.0 [55.5, 99.7] | 76.4 [63.0, 86.8] | 40.9 [20.7, 63.6] | 97.7 [87.7, 99.9] | 0.45 [0.24, 0.66] | <0.01   |

Nb: Cut off = <-2SD below the mean. Control data was used to calculate cut-offs for the Bayley Scales of Infant and Toddler Development, Third Edition (Bayley-III). Published norms were used to calculate cut offs for the Parent Report of Children's Abilities-Revised (PARCA-R) and the Ages & Stages Questionnaires Third Edition (ASQ-3), as per their respective manuals. p-values are from the McNemar test.

Sens= Sensitivity; Spec= Specificity; PPV= Positive Predictive Value; NPV= Negative Predictive Value

Supplementary Figure 1. Participant Flowchart

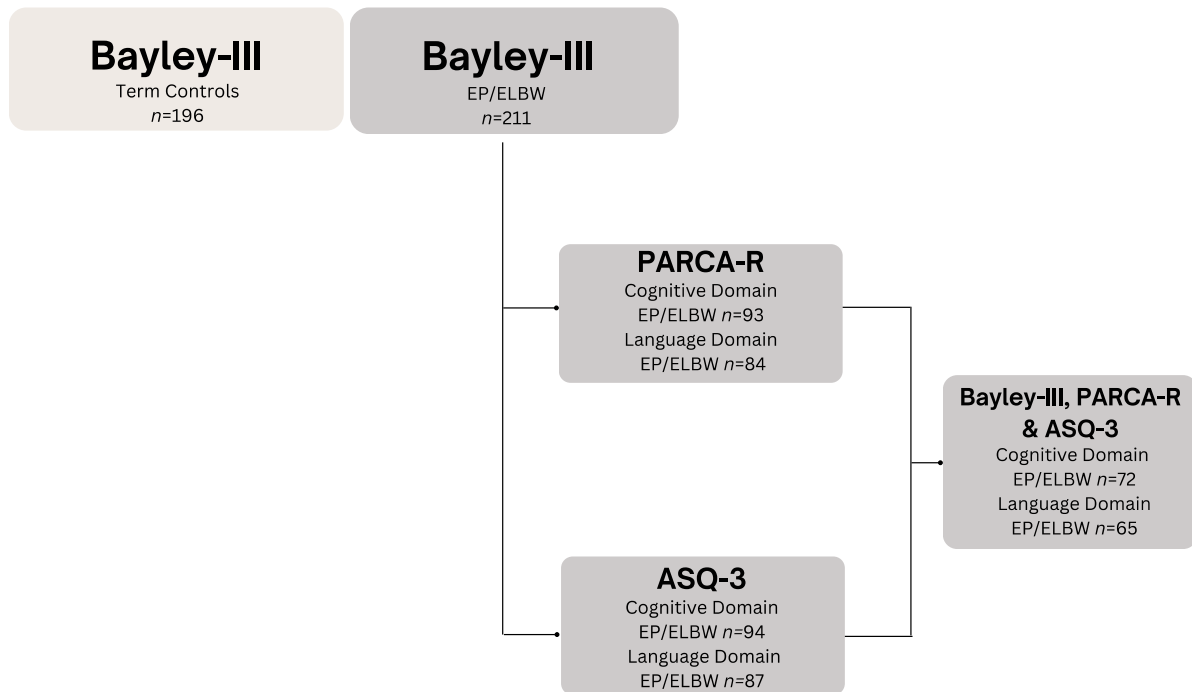

Bayley-III = Bayley Scales of Infant and Toddler Development, Third Edition; PARCA-R= Parent Report of Children's Abilities-Revised; ASQ-3= Ages & Stages Questionnaires Third Edition; EP/ELBW= Extremely preterm/extremely low birth weight
